# Supplementary material for: Meta-stability through intermolecular interactions protecting the identity of atomic metal clusters: ab initio evidences in (Cu5–Cu5)n (n < 3) cases
Source: Royal Society of Chemistry journal article supplement (doi:10.1039/d2cp03537e), 2022-01-01
Supplement: d2cp03537e1.pdf [file d2cp03537e1.pdf]

Cite this: DOI:00.0000/xxxxxxxxxx

## Electronic Supplementary Information: Meta-stability through intermolecular interactions protecting the identity of atomic metal clusters: *Ab initio* evidences in $(\text{Cu}_5-\text{Cu}_5)_n$ ( $n < 3$ ) cases.<sup>†</sup>

Berta Fernández<sup>a\*</sup> and María Pilar de Lara-Castells<sup>b\*</sup>

### Notes and references

- 1 J. Garrido-Aldea and M. P. de Lara-Castells, *Phys. Chem. Chem. Phys.*, 2022, **24**, 24810–24822.
- 2 J. P. Perdew, K. Burke and M. Ernzerhof, *Phys. Rev. Lett.*, 1996, **77**, 3865–3868.
- 3 E. Caldeweyher, S. Ehlert, A. Hansen, H. Neugebauer, S. Spicher, C. Bannwarth and S. Grimme, *J. Chem. Phys.*, 2019, **150**, 154122.

<sup>a</sup> Department of Physical Chemistry. University of Santiago de Compostela. E-15782. E-mail: berta.fernandez@usc.es

<sup>b</sup> Institute of Fundamental Physics (AbinitSim Unit), Madrid, Spain. E-mail: Pilar.deLara.Castells@csic.es

Table 1 Cartesian coordinates (in Å) of the optimized structures corresponding to Figure 1 and Tables 1 and 2 of the main manuscript. CCSD/Def2-TZVP, Def2-TZVPP- and DF-CASSCF(10,10)/cc-pVTZ-PP-based results are shown for isolated Cu<sub>5</sub> and coupled Cu<sub>5</sub>-Cu<sub>5</sub> clusters, respectively. The term 'Cu<sub>5</sub>-bp' corresponds to the bypyramidal Cu<sub>5</sub> 3D structure.

| <b>Cu<sub>5</sub>-planar, CCSD/Def2-TZVP</b> | <b>X</b>      | <b>Y</b>      | <b>Z</b>      |
|----------------------------------------------|---------------|---------------|---------------|
| Cu                                           | -1.257528     | -1.283399     | 0.000251      |
| Cu                                           | 1.257490      | -1.283387     | -0.000251     |
| Cu                                           | -2.442286     | 0.864920      | -0.000126     |
| Cu                                           | 2.442316      | 0.864881      | 0.000132      |
| Cu                                           | 0.000007      | 0.836985      | -0.000006     |
| <b>Cu<sub>5</sub>-bp, CCSD/Def2-TZVP</b>     | <b>X</b>      | <b>Y</b>      | <b>Z</b>      |
| Cu                                           | 0.000000      | 1.278654      | -0.736969     |
| Cu                                           | 0.000000      | -1.278654     | -0.736969     |
| Cu                                           | 1.970676      | 0.000000      | -0.000339     |
| Cu                                           | -1.970676     | 0.000000      | -0.000339     |
| Cu                                           | 0.000000      | 0.000000      | 1.474615      |
| <b>Cu<sub>5</sub>-bp, CCSD/Def2-TZVPP</b>    | <b>X</b>      | <b>Y</b>      | <b>Z</b>      |
| Cu                                           | 0.000000      | 1.274377      | 0.146646      |
| Cu                                           | -0.000000     | -1.274377     | 0.146646      |
| Cu                                           | 1.959735      | 0.000000      | 0.881618      |
| Cu                                           | -1.959735     | 0.000000      | 0.881618      |
| Cu                                           | -0.000000     | 0.000000      | 2.351058      |
| <b>Cluster 1</b>                             | <b>X</b>      | <b>Y</b>      | <b>Z</b>      |
| Cu                                           | 2.2342249950  | 1.9624549506  | 0.0748486461  |
| Cu                                           | -2.0522113999 | 1.7256038455  | -0.0446353691 |
| Cu                                           | 0.1866253320  | 0.1043525010  | 0.0310209444  |
| Cu                                           | 0.0127164996  | 2.5884916673  | 1.3480108993  |
| Cu                                           | 0.0885257269  | 2.5682349512  | -1.3312257445 |
| Cu                                           | 1.2872914643  | 4.4930744703  | 0.0289306592  |
| Cu                                           | -1.3884396321 | 4.3452774038  | -0.0457116789 |
| Cu                                           | -0.1862194363 | 6.8911876914  | -0.0309398804 |
| Cu                                           | -0.0303714799 | 5.1444105640  | -2.1654420728 |
| Cu                                           | -0.1521430694 | 5.1769119548  | 2.1351435966  |
| <b>Cluster 2</b>                             | <b>X</b>      | <b>Y</b>      | <b>Z</b>      |
| Cu                                           | 0.3217539858  | 0.8219452327  | -0.1683691674 |
| Cu                                           | 0.2633470323  | -1.1947873922 | 1.8857120104  |
| Cu                                           | 1.8702256439  | 0.7961496484  | 2.0156452338  |
| Cu                                           | -2.2733079314 | -0.6933003854 | 2.5708803119  |
| Cu                                           | -0.7285312045 | 1.4156244592  | 2.1563514749  |
| Cu                                           | 0.8674637658  | 2.1287705439  | 4.1883800201  |
| Cu                                           | -0.5908200883 | -2.1028916646 | 4.2404839504  |
| Cu                                           | 1.4371509934  | -0.5073392563 | 4.2983446981  |
| Cu                                           | -1.0859876011 | 0.4405338469  | 4.6812939562  |
| Cu                                           | -0.0812945956 | -1.1047040327 | 6.6453895116  |
| <b>Cluster 3</b>                             | <b>X</b>      | <b>Y</b>      | <b>Z</b>      |
| Cu                                           | -1.2603993699 | -1.8010688900 | 3.4774873829  |
| Cu                                           | 0.3723222660  | 0.2023087941  | 3.5504021997  |
| Cu                                           | 1.9625231176  | 2.1773390667  | 4.0380151307  |
| Cu                                           | -0.6830104270 | -0.9453763891 | 5.8520758426  |
| Cu                                           | 0.9351330021  | 1.0518383319  | 6.1304864315  |
| Cu                                           | 0.8986142499  | -0.8676967392 | 8.1224721552  |
| Cu                                           | -1.0957595170 | 0.7690604045  | 7.9855838914  |
| Cu                                           | 1.6186376548  | -1.8244864743 | 10.4203837194 |
| Cu                                           | -2.3545719554 | 1.4428977943  | 10.1462616017 |
| Cu                                           | -0.3934890216 | -0.2048158992 | 10.4909446449 |
| <b>Cluster 4</b>                             | <b>X</b>      | <b>Y</b>      | <b>Z</b>      |
| Cu                                           | 1.3090338597  | 0.1010288580  | -0.7104059189 |
| Cu                                           | -1.2779098404 | -0.1327426402 | -0.7143503857 |
| Cu                                           | 2.5221416757  | 0.0005717085  | 1.6517595204  |
| Cu                                           | -2.5093736208 | 0.0170265311  | 1.6343604434  |
| Cu                                           | 0.0084130927  | 0.0143845348  | 1.6126054359  |
| Cu                                           | 1.2190472968  | 0.7119902776  | 3.9448677111  |
| Cu                                           | -1.2179961557 | -0.7041151841 | 3.9278337936  |
| Cu                                           | 1.9328919118  | 1.6389686461  | 6.2710645008  |
| Cu                                           | -1.9691635367 | -1.6417594734 | 6.2337019635  |
| Cu                                           | -0.0170846832 | -0.0053532583 | 6.3626759357  |

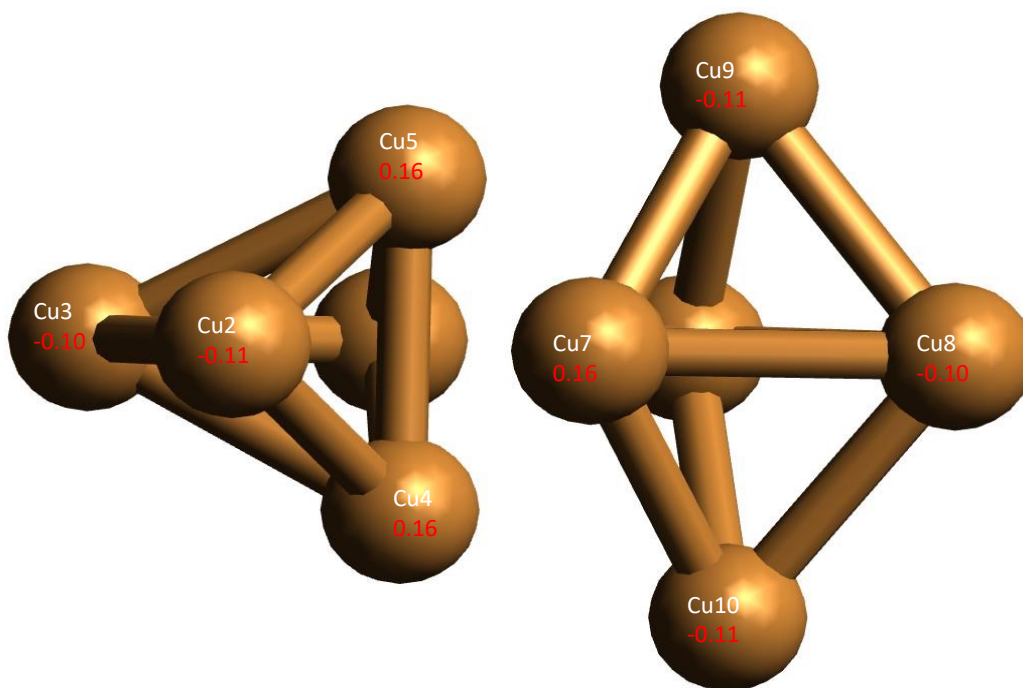

Fig. 1 Complex 1 structure obtained at DF-CASSCF(10,10)/cc-pVTZ-PP level showing the two  $\text{Cu}_5$  subunits. The Mulliken charges (in a.u.) presented in Table 3 of the main manuscript are shown in red color.

Table 2 Values of Cu–Cu distances (in Å) for the structure shown in Figure 1. An active (10,10) space has been used for both DF-CASSC/cc-pVTZ-PP- and RS2C/cc-pVTZ-PP-based geometry optimizations. For comparison purposes, DFT-D4/Def2-TZVPP values from Ref. 1 are included. These DFT-D4 values were obtained by using the Perdew-Burke-Ernzerhof (PBE) density functional<sup>2</sup> aided with D4 Grimme's parametrization for the dispersion correction.<sup>3</sup> The average values for the Cu–Cu distances are 2.7, 2.5, and 2.4 Å for DF-CASSCF/cc-pVTZ-PP-, DFT-D4/Def2-TZVZPP-, and RS2C/cc-pVTZ-PP-based optimizations, respectively. Values between parenthesis and square brackets have been obtained for (isolated)  $\text{Cu}_5$  through RS2C/cc-pVTZ-PP-based and CCSD/Def2-TZVPP-based optimizations, respectively. The magnitude of polarization effects in RS2C re-optimized  $\text{Cu}_5$ – $\text{Cu}_5$  structures is larger than without further re-optimization. However, the nature of the polarization effects is the same as the relative stability of different coupled  $\text{Cu}_5$ – $\text{Cu}_5$  isomers.

|         | DF-CASSCF | DFT-D4 | RS2C  | RS2C    | CCSD    |
|---------|-----------|--------|-------|---------|---------|
| Cu3–Cu5 | 2.814     | 2.515  | 2.429 | (2.418) | [2.549] |
| Cu5–Cu4 | 2.683     | 2.560  | 2.421 | (2.418) | [2.549] |
| Cu3–Cu2 | 2.766     | 2.475  | 2.437 | (2.418) | [2.549] |
| Cu2–Cu4 | 2.635     | 2.425  | 2.358 | (2.349) | [2.450] |
| Cu7–Cu9 | 2.641     | 2.424  | 2.358 | (2.349) | [2.450] |
| Cu6–Cu7 | 2.683     | 2.559  | 2.420 | (2.418) | [2.546] |
| Cu6–Cu9 | 2.763     | 2.476  | 2.358 | (2.349) | [2.450] |
| Cu7–Cu8 | 2.813     | 2.516  | 2.429 | (2.418) | [2.546] |
